# Supplementary figures and images for: Mechanisms of Glioma Formation: Iterative Perivascular Glioma Growth and Invasion Leads to Tumor Progression, VEGF-Independent Vascularization, and Resistance to Antiangiogenic Therapy
Source: PubMed Central journal article supplement — Neoplasia. 2014 Aug 9;16(7):543–61. doi: 10.1016/j.neo.2014.06.003 (PMC4198934; doi:10.1016/j.neo.2014.06.003), 2014-08-09

# Supplementary Figure 1.

## A

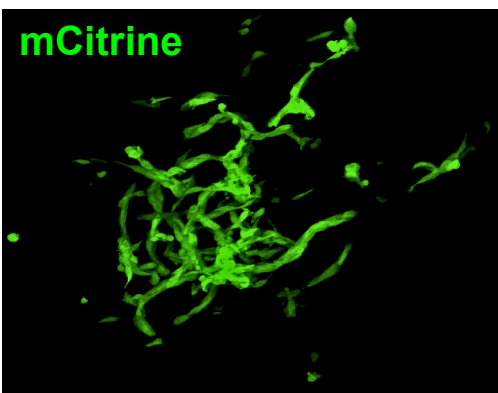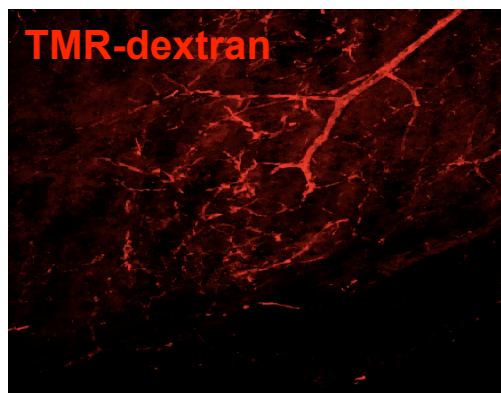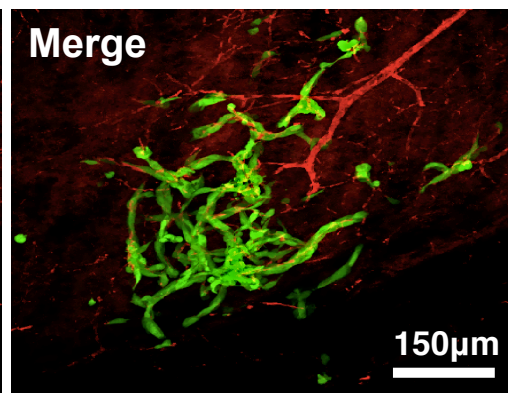

## B

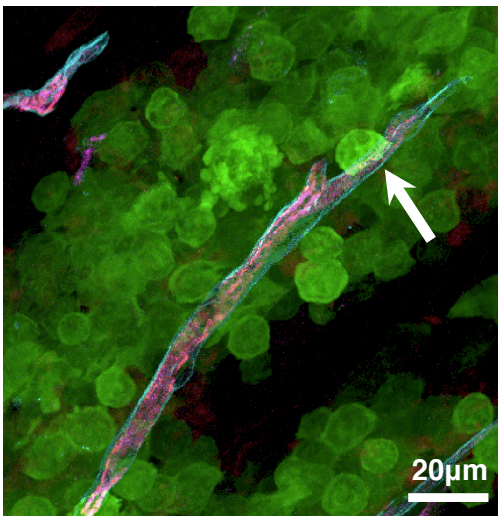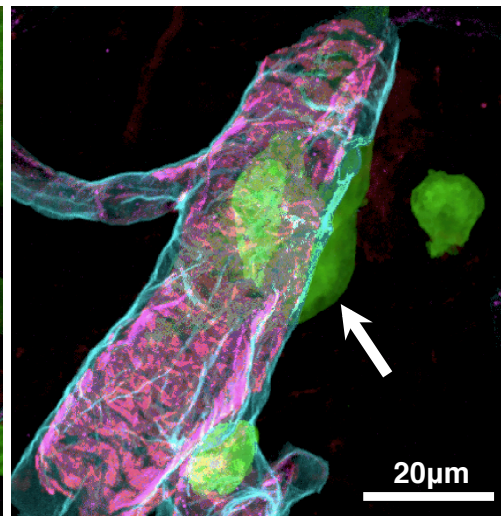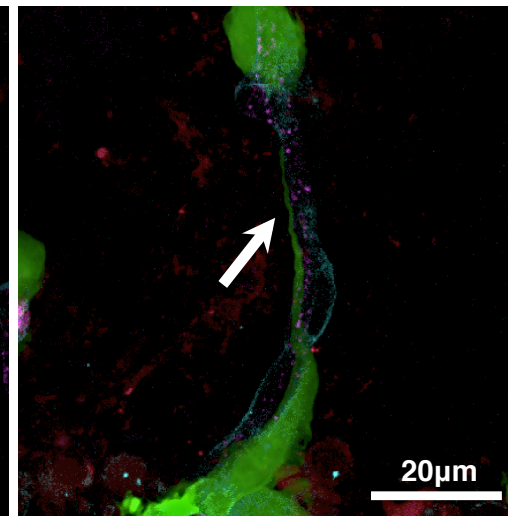

Supplement: mmc1.pdf [file mmc1.pdf]

# Supplementary Figure 2.

## A

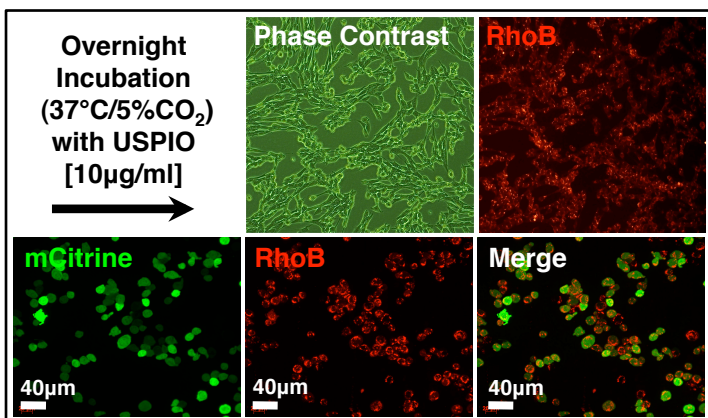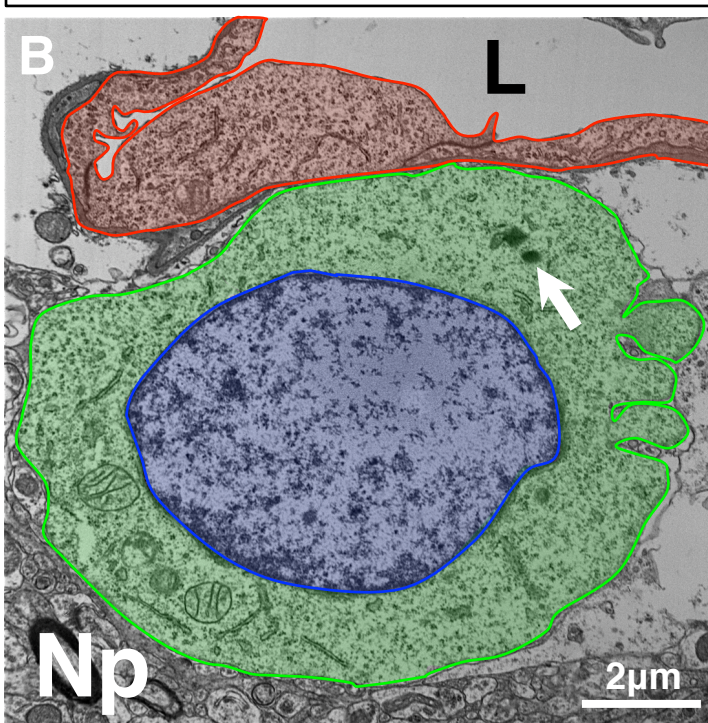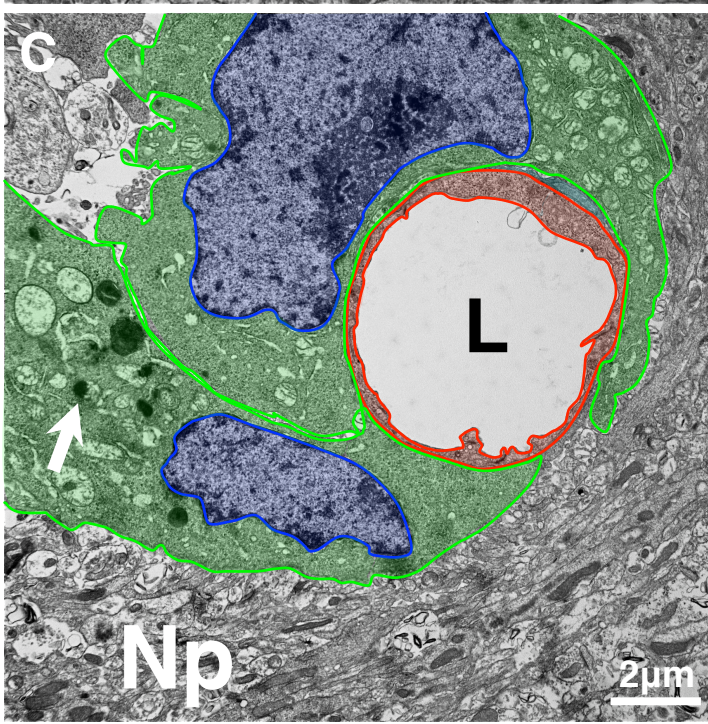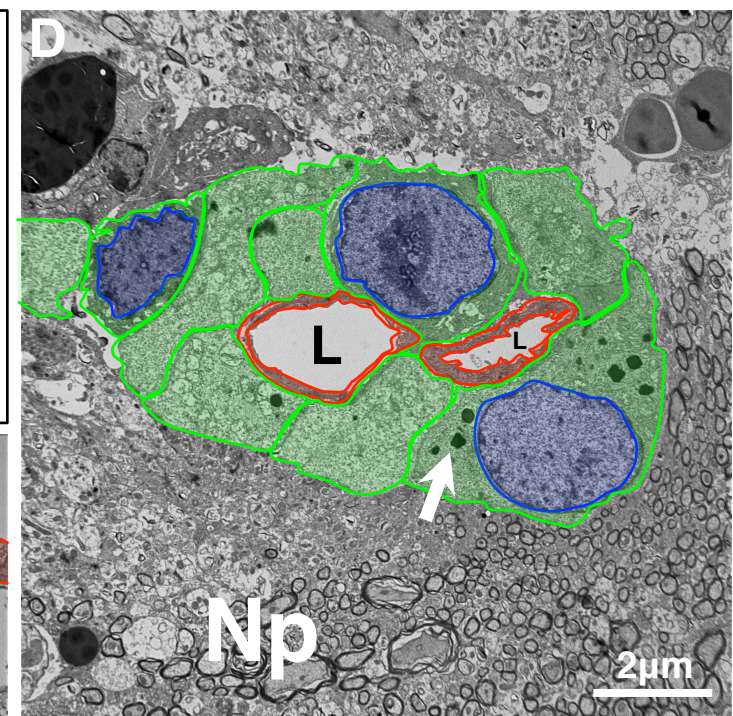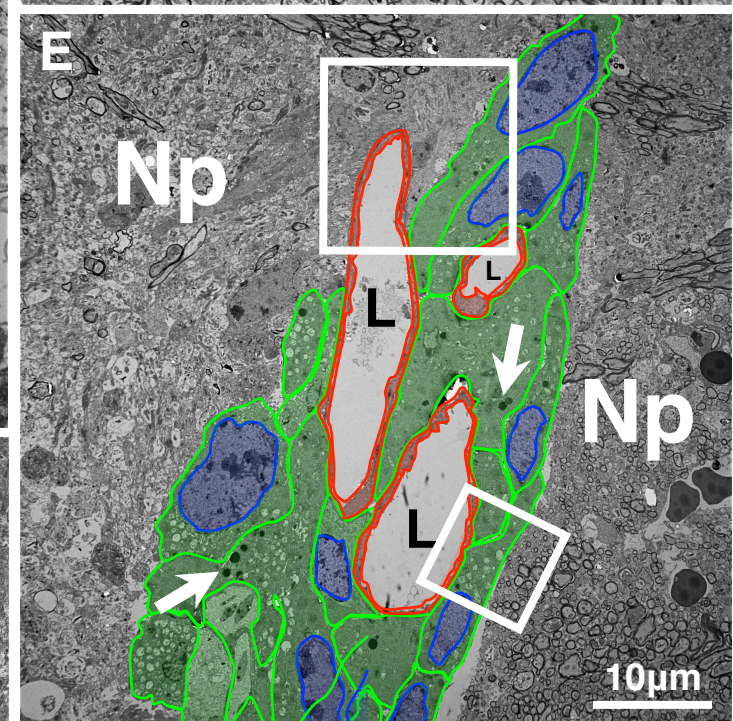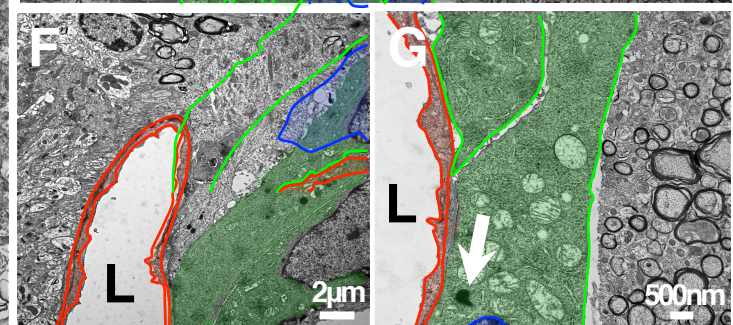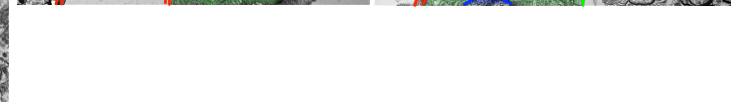

Supplement: mmc2.pdf [file mmc2.pdf]

# Supplementary Figure 3.

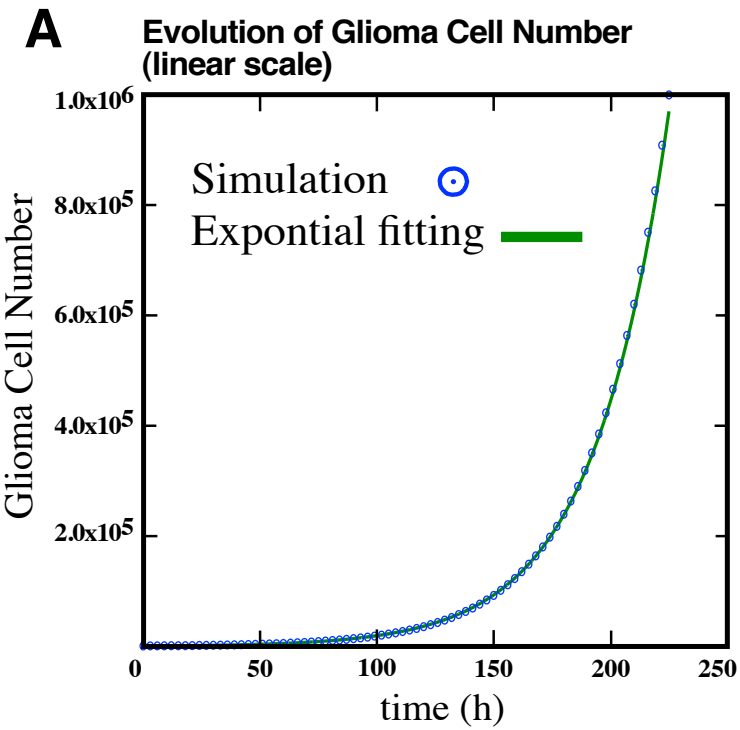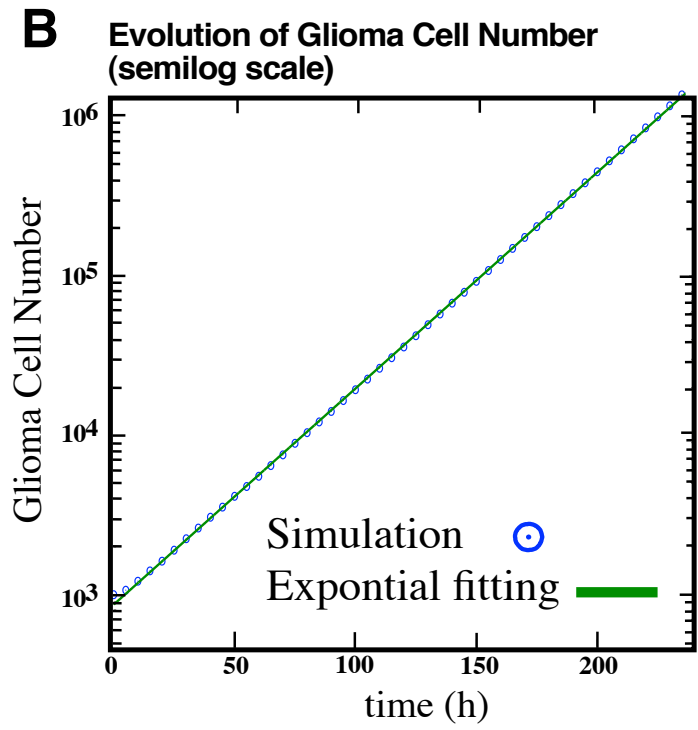

Supplement: mmc3.pdf [file mmc3.pdf]

# Supplementary Figure 4.

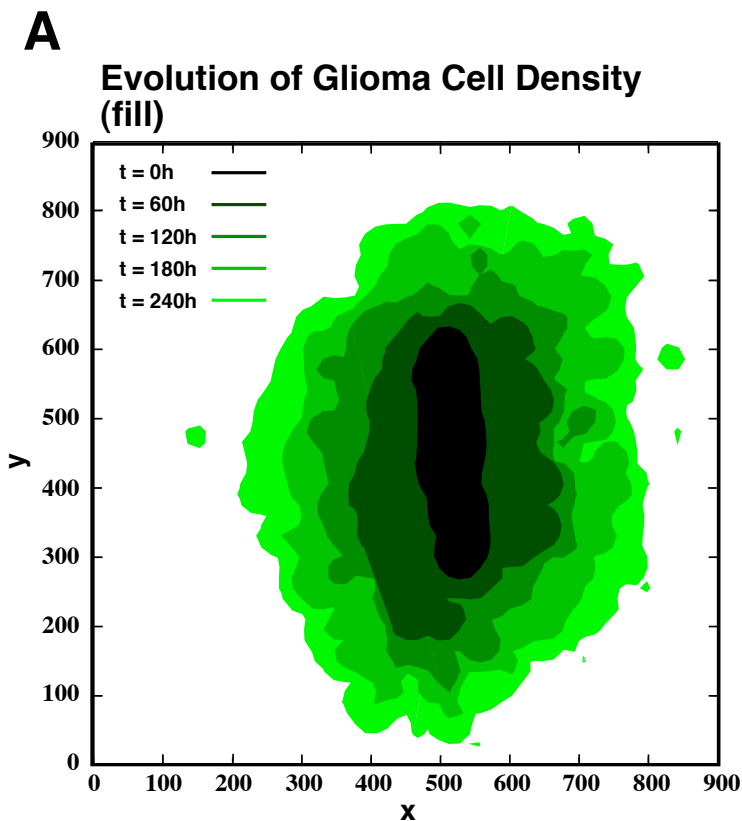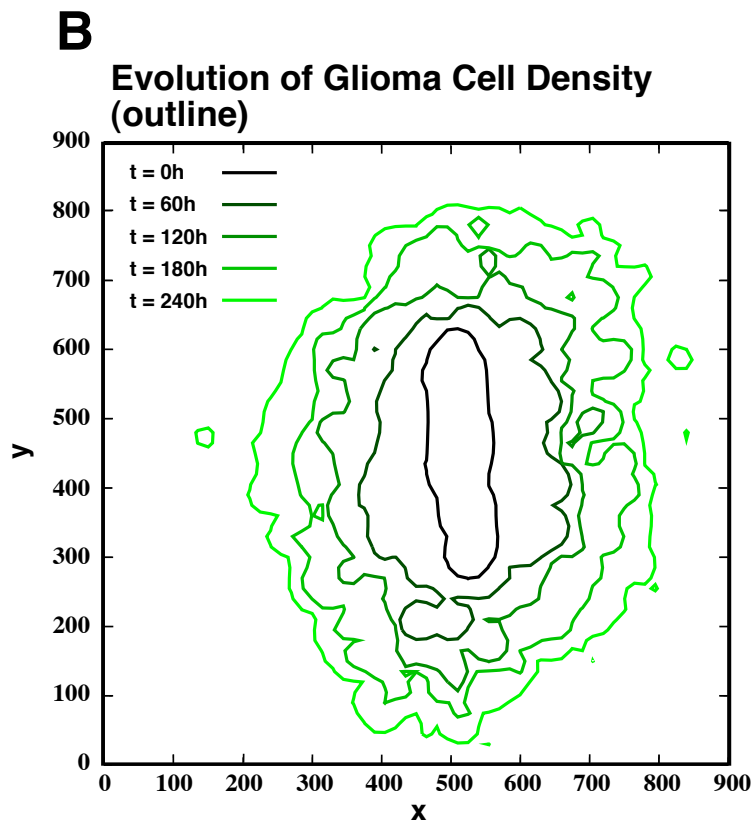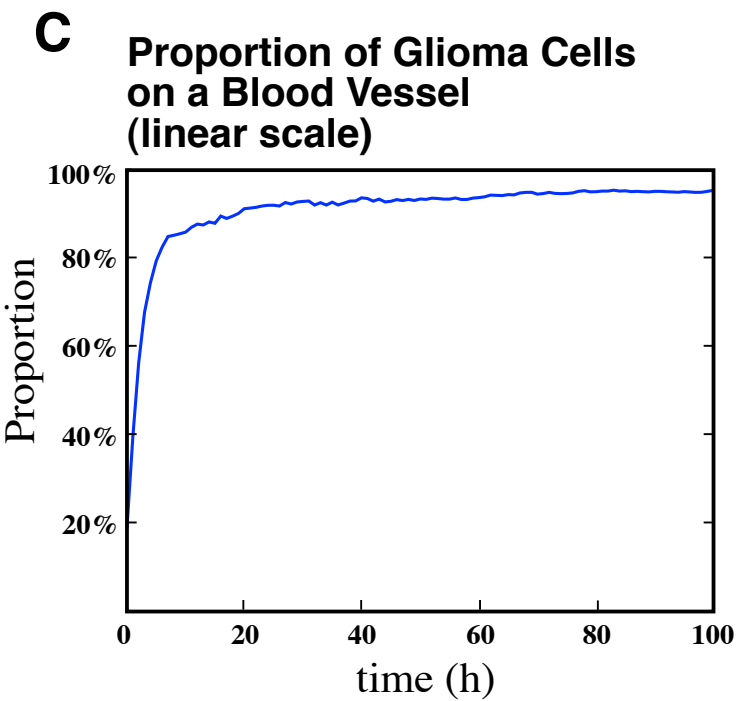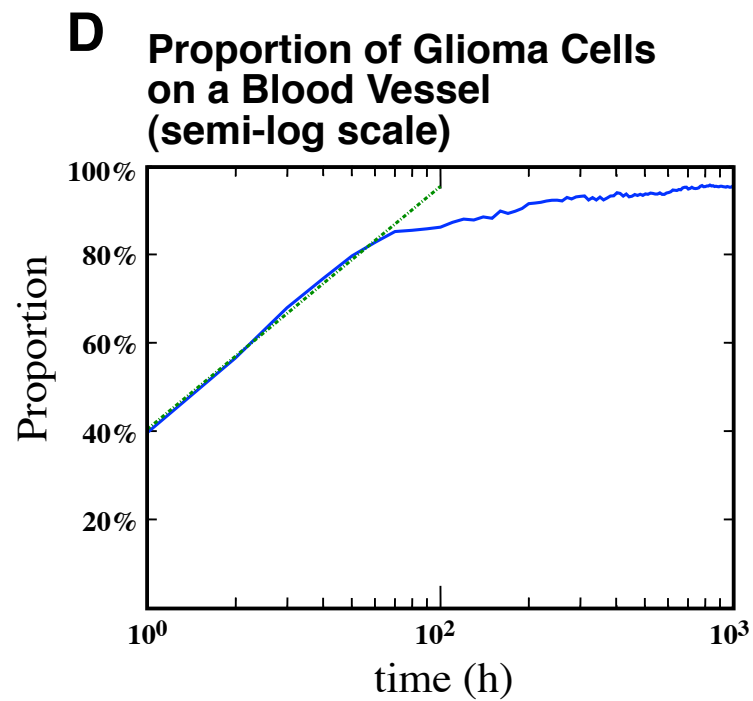

Supplement: mmc4.pdf [file mmc4.pdf]

Supplementary Figure 5.

Bevacizumab

Control IgG

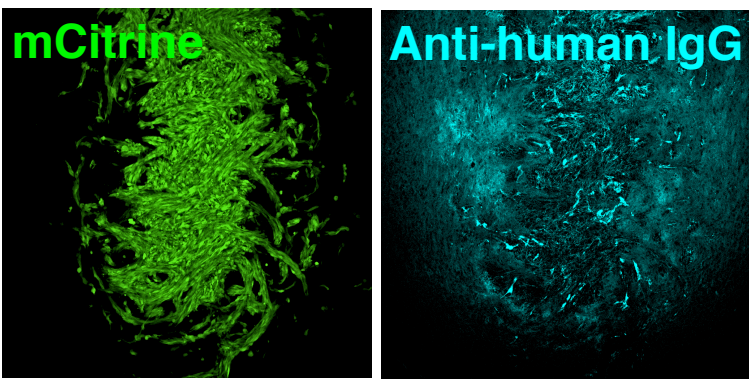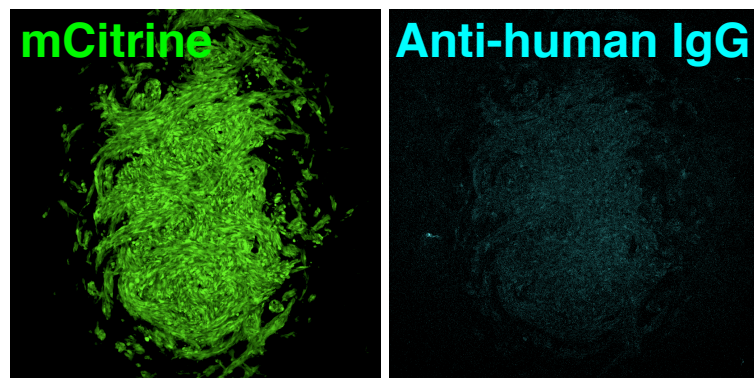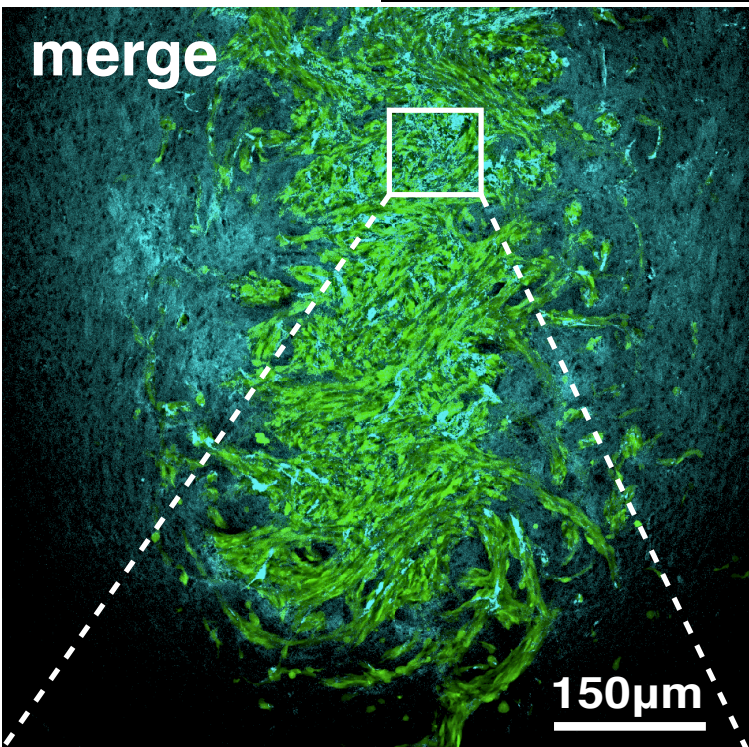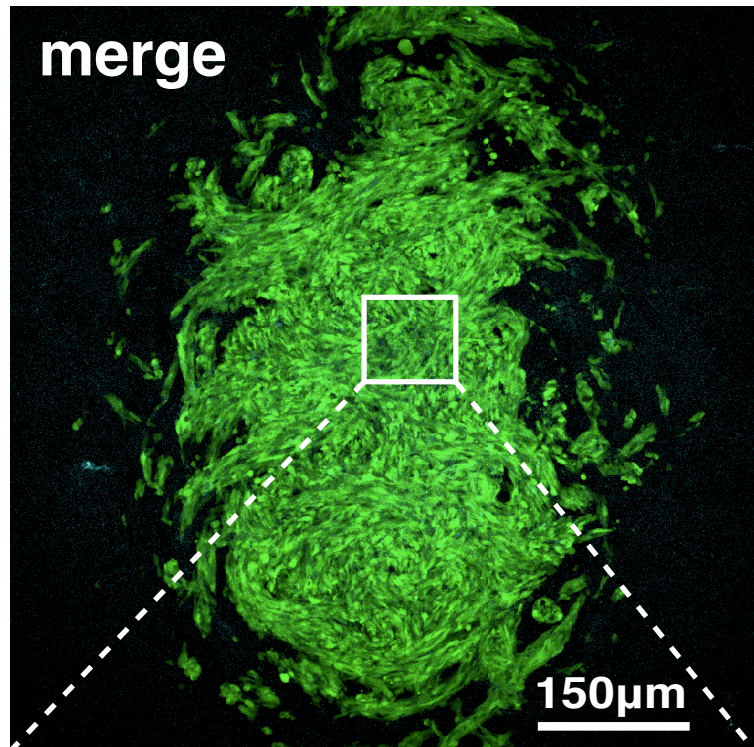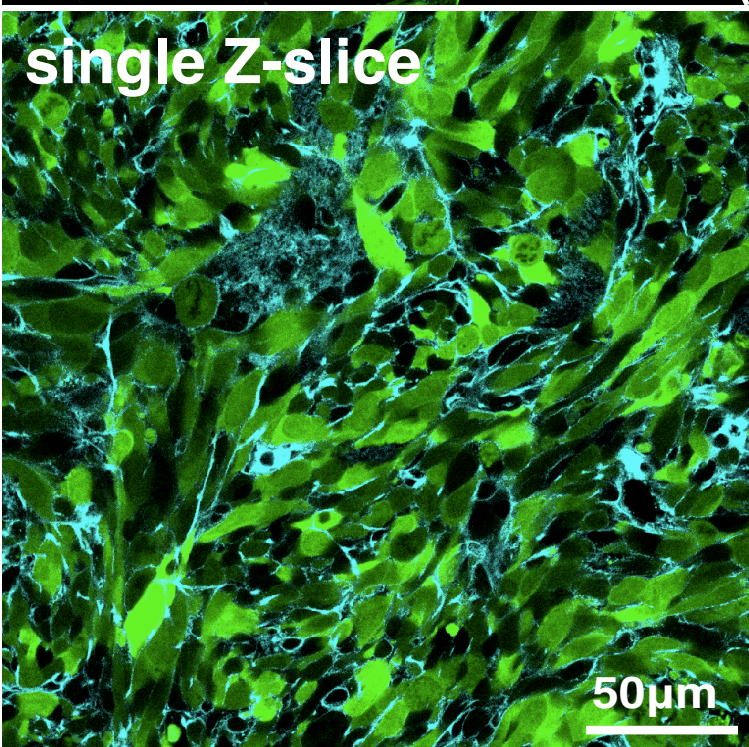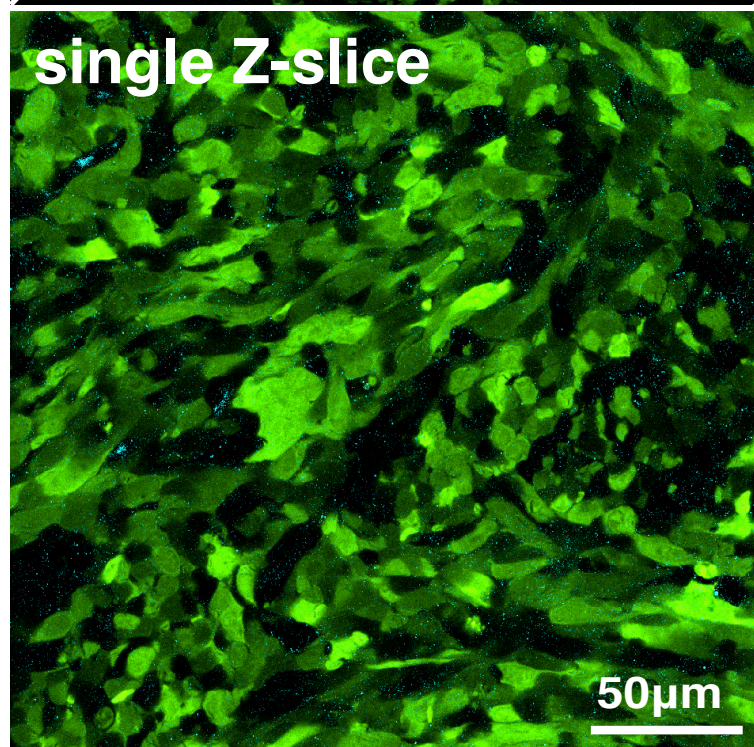

Supplement: mmc5.pdf [file mmc5.pdf]

Supplementary Figure 6.

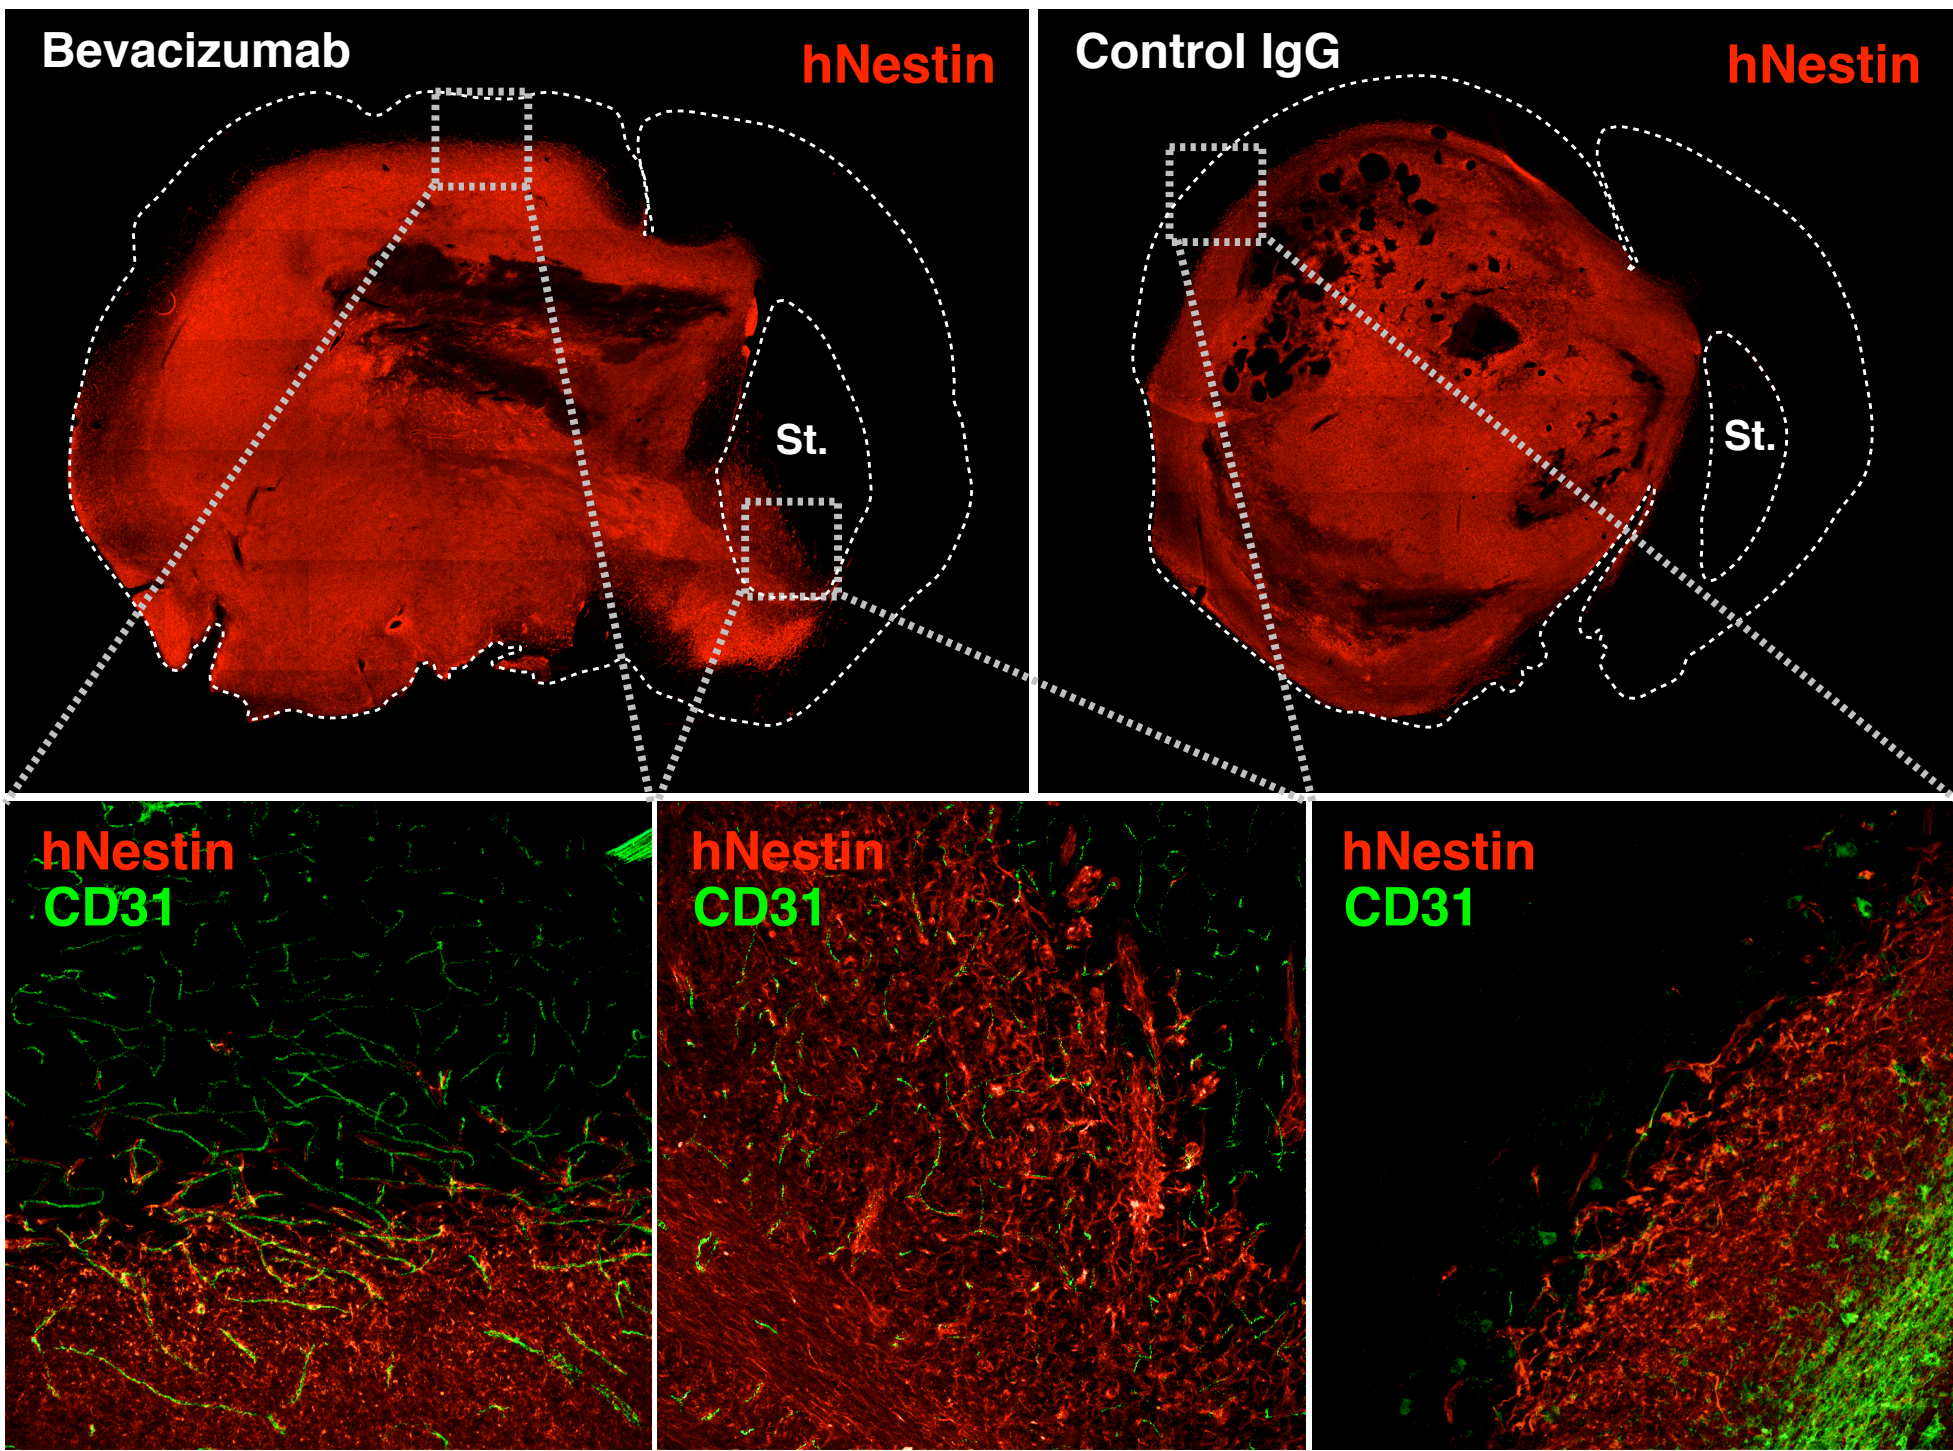

Supplement: mmc6.pdf [file mmc6.pdf]

# Supplementary Figure 7.

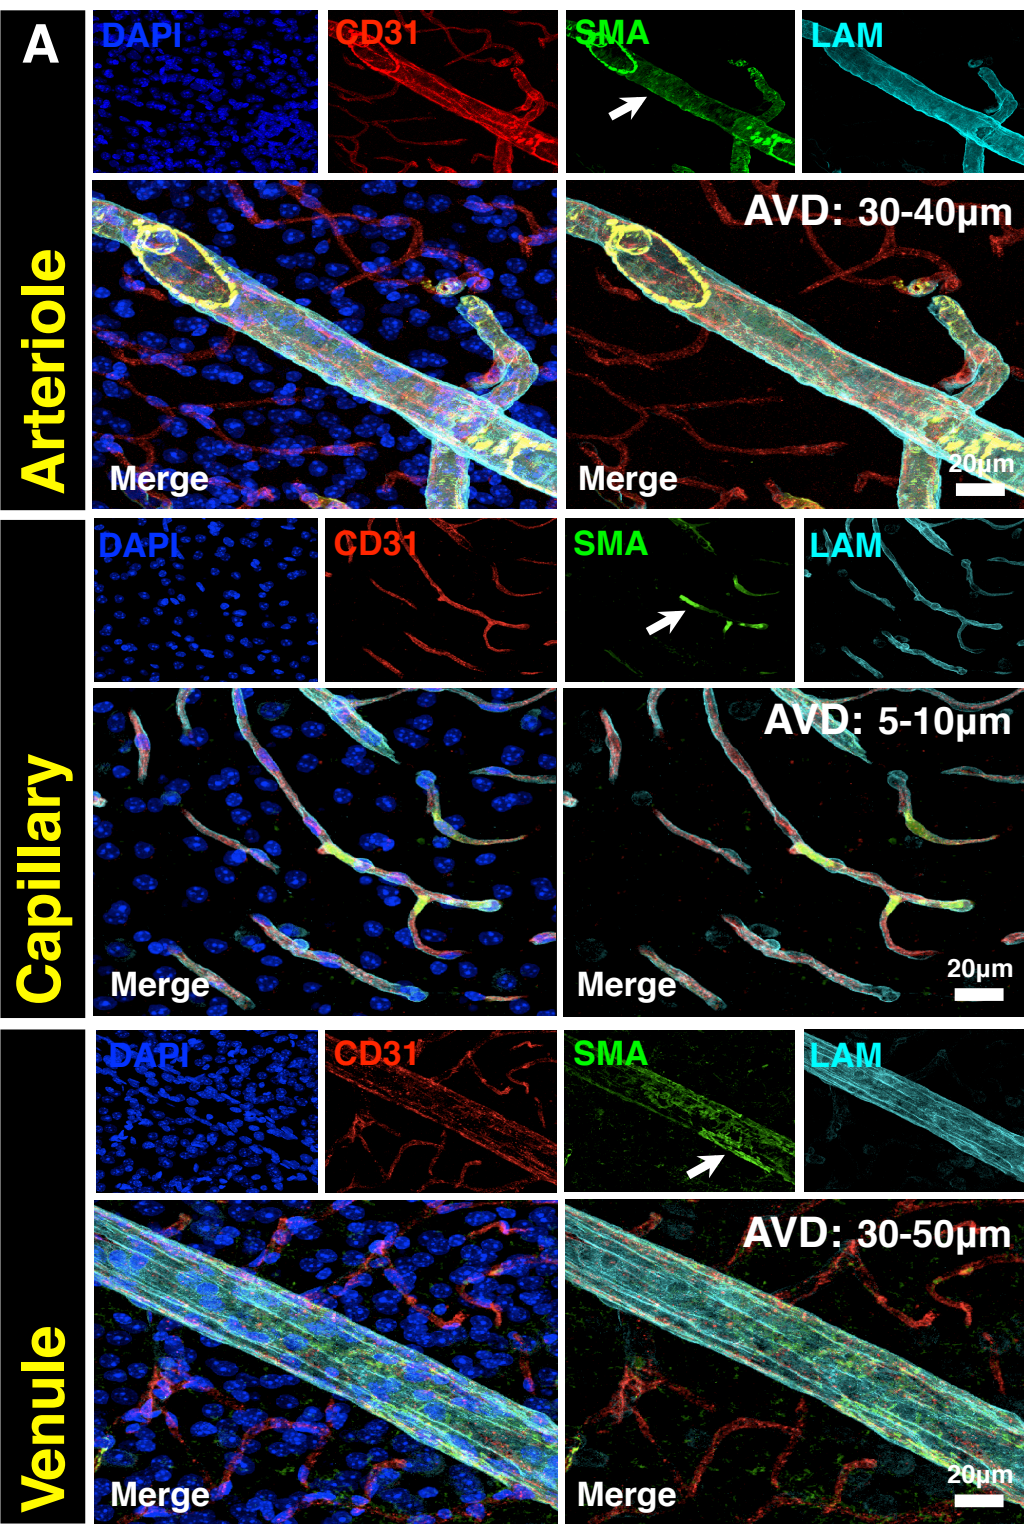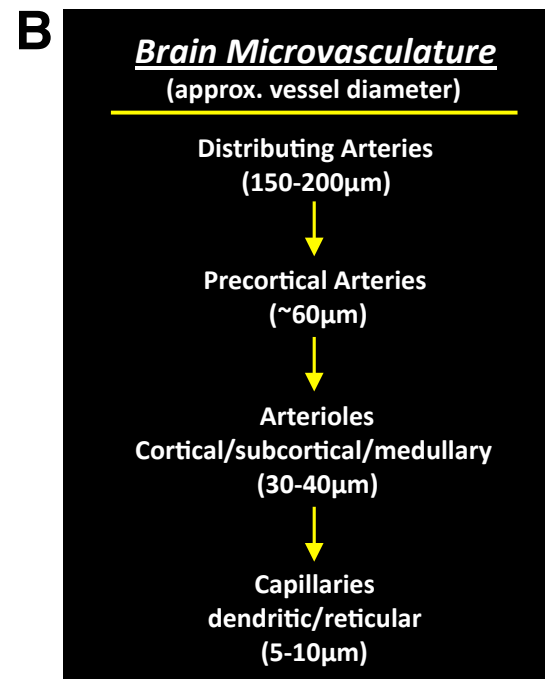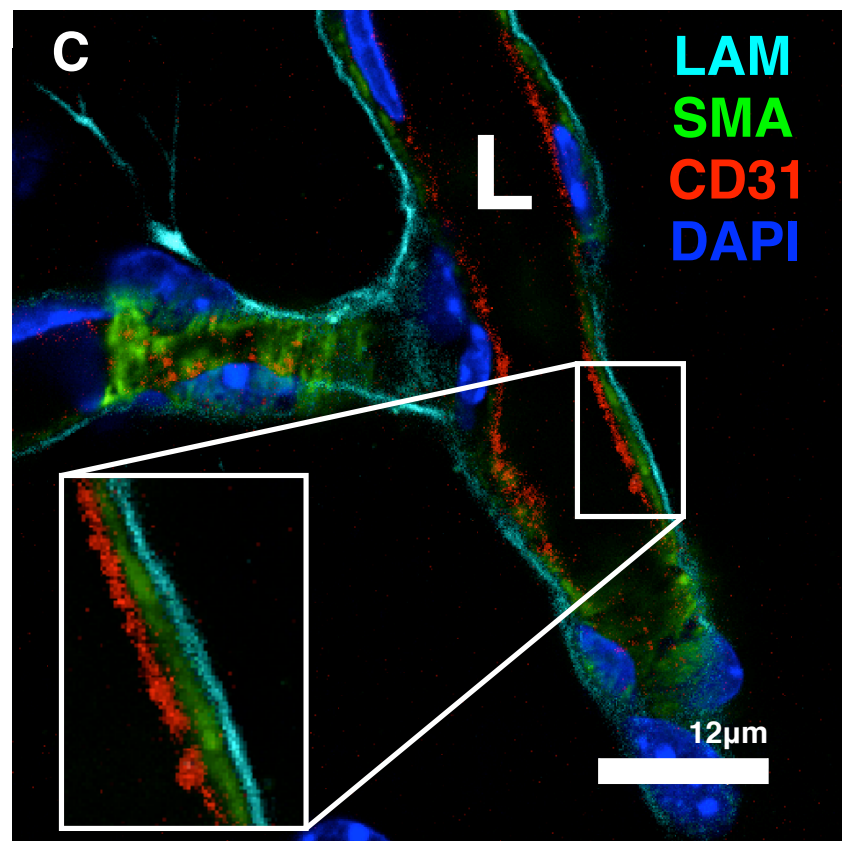

Supplement: mmc7.pdf [file mmc7.pdf]
